# Supplementary material for: Hot injection synthesis of CuInS2 nanocrystals using metal xanthates and their application in hybrid solar cells
Source: Royal Society of Chemistry journal article supplement (doi:10.1039/c8nj04823a), 2018-11-23
Supplement: c8nj04823a1.pdf [file c8nj04823a1.pdf]

## Supplementary Information

# Hot Injection Synthesis of CuInS<sub>2</sub> Nanocrystals using Metal Xanthates and Their Application in Hybrid Solar Cells

Verena Perner,<sup>1</sup> Thomas Rath,<sup>1,\*</sup> Franz Pirolt,<sup>1</sup> Otto Glatter,<sup>1</sup> Karin Wewerka,<sup>2</sup> Ilse Letofsky-Papst,<sup>2</sup> Peter Zach,<sup>3</sup> Mathias Hobisch,<sup>4</sup> Birgit Kunert,<sup>5</sup> Gregor Trimmel<sup>1,\*</sup>

<sup>1</sup> Institute for Chemistry and Technology of Materials (ICTM), NAWI Graz, Graz University of Technology, Stremayrgasse 9, 8010 Graz, Austria

<sup>2</sup> Institute for Electron Microscopy and Nanoanalysis and Center for Electron Microscopy, Graz University of Technology, NAWI Graz, Steyrergasse 17, 8010 Graz, Austria

<sup>3</sup> Institute of Analytical Chemistry and Food Chemistry, NAWI Graz, Graz University of Technology, Graz, Austria, Stremayrgasse 9, 8010 Graz, Austria

<sup>4</sup> Institute of Paper, Pulp and Fibre Technology, Graz University of Technology, Inffeldgasse 23, 8010 Graz, Austria

<sup>5</sup> Institute of Solid State Physics, Graz University of Technology, Petersgasse 16, 8010 Graz, Austria

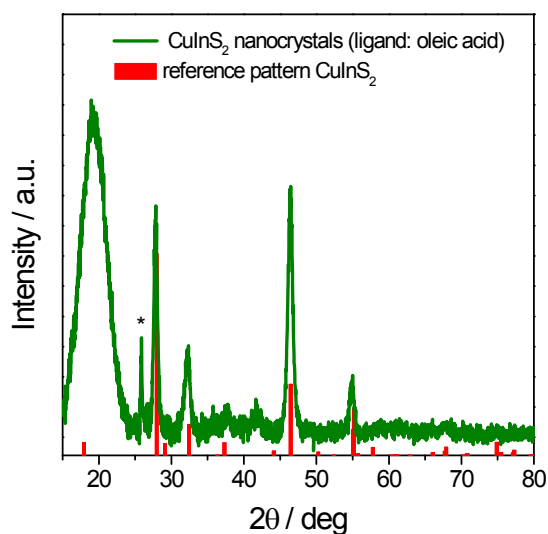

**Fig. S1** X-ray diffraction pattern of the CuInS<sub>2</sub> nanocrystal sample prepared with oleic acid as capping ligand. The peak marked with an asterisk stems from a secondary phase. The broad peak around 20 ° 2θ can be ascribed to the capping ligand in the sample.

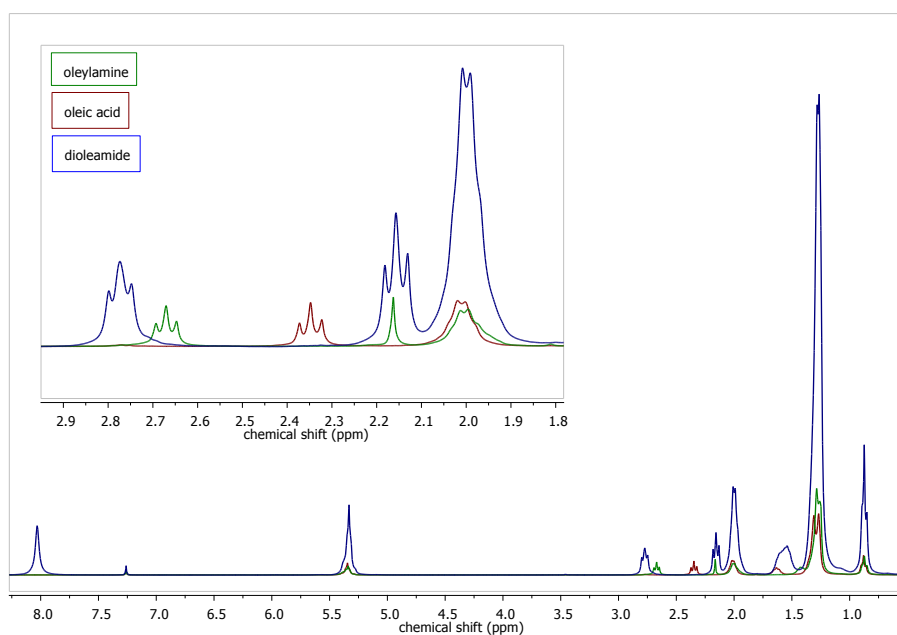

**Fig. S2** <sup>1</sup>H-NMR pattern of oleylamine (green), oleic acid (red) and dioleamide (blue).

The <sup>1</sup>H-NMR spectra of oleylamine, oleic acid and dioleamide is shown in Fig. S1. The characteristic broad signal of the carboxylic acid group (11 ppm, not shown in this figure for a better visibility of the other peaks) has vanished in favor of a new peak (8.05 ppm) which can be assigned to the newly formed CO-NH functionality of dioleamide. The triplet of the CH<sub>2</sub> group next to the amino

functionality in oleylamine at around 2.65 ppm is shifted downfield (to 2.8 ppm) whereas the CH<sub>2</sub> group adjacent to the carbonyl functionality is shifted upfield (from 2.35 ppm to 2.15 ppm) as a consequence of amide formation.

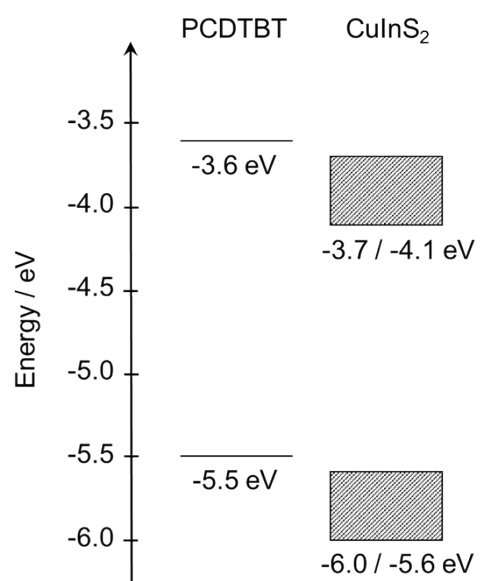

**Fig. S3** Energy levels of the conjugated polymer PCDTBT<sup>1</sup> and CuInS<sub>2</sub> nanocrystals.<sup>2,3</sup>

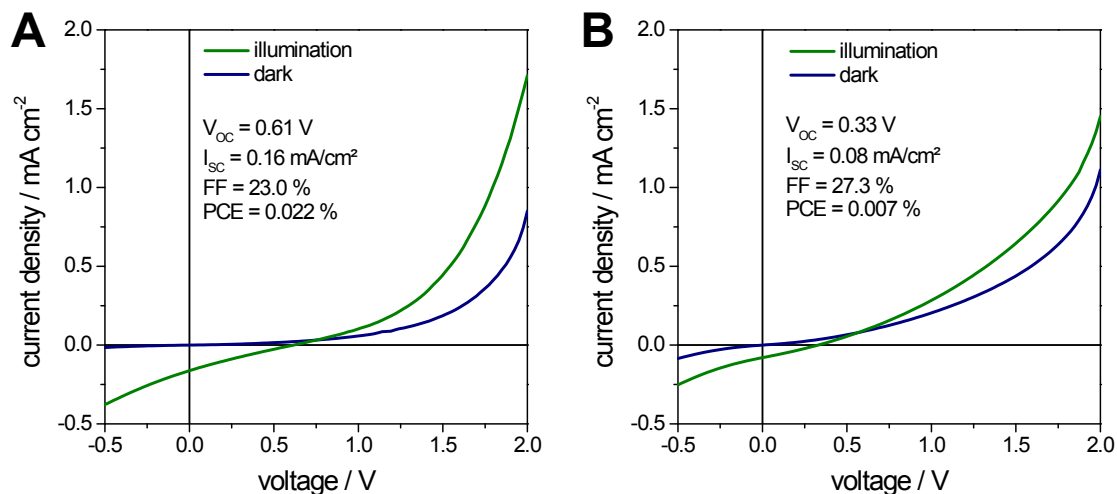

**Fig. S4** JV curves of typical PCDTBT/CuInS<sub>2</sub> based solar cells with a polymer/CuInS<sub>2</sub> weight ratio of 1:5 (A) and 1:15 (B) in the dark and under 100 mW/cm<sup>2</sup> illumination.

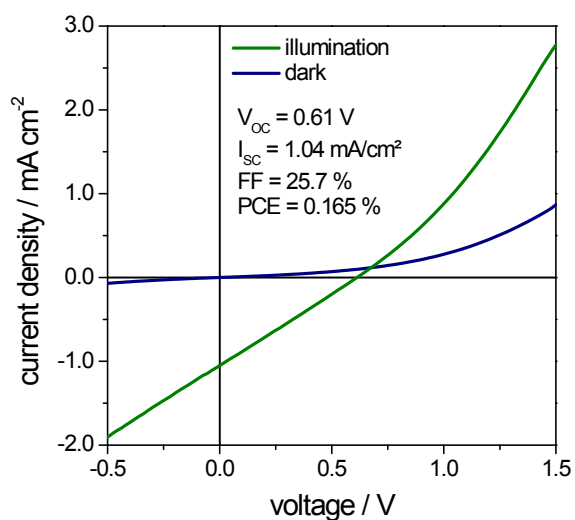

**Fig. S5** JV curves of a typical PCDTBT/CuInS<sub>2</sub> based solar cell with a polymer/CuInS<sub>2</sub> weight ratio of 1:9 in the dark and under 100 mW/cm<sup>2</sup> illumination. The absorber layer was annealed at 140 °C for 10 min after spin coating.

## References:

<sup>1</sup> N. Blouin, A. Michaud and M. Leclerc, *Adv. Mater.*, 2007, **19**, 2295-2300.

<sup>2</sup> E. Arici, N. Sariciftci and D. Meissner, *Adv. Funct. Mater.*, 2003, **13**, 165-171.

<sup>3</sup> H. Zhong, S. S. Lo, T. Mirkovic, Y. Li, Y. Ding, Y. Li and G. D. Scholes, *ACS Nano*, 2010, **4**, 5253-5262.
